# Supplementary material
Source: Springer Nature journal article supplement (https://www.springermedizin.de/resource/supplementary/13256_2011_2050_MOESM1_ESM.pdf/9649780)

A

57%

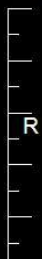

10 cm

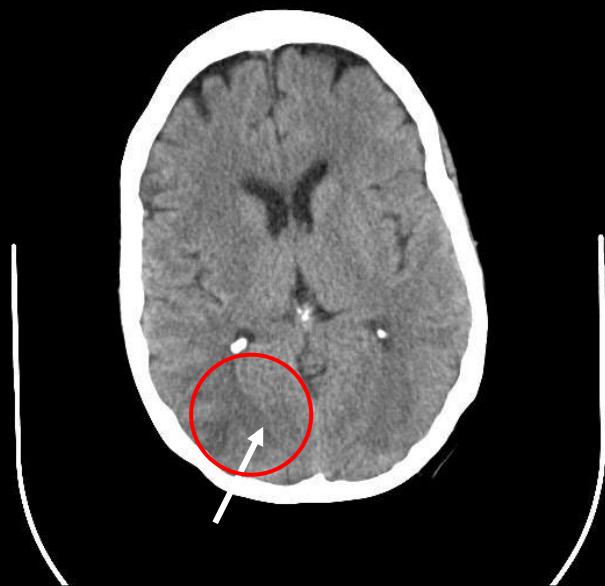

Supplement: MOESM1 [file 9649780]
